# Supplementary material for: De novo DNA demethylation and noncoding transcription define active intergenic regulatory elements
Source: HighWire-hosted journal article supplement (doi:10.1101/gr.157271.113), 2013-06-28
Supplement: Supp_Legends.docx [file Supp_Legends.docx]

**Supplementary Files and Figures**

**Figures**

**S1. Summary of HMR properties**

1. Fraction of HMRs overlapping CpG Islands (UCSC)
2. CpG Density (observed / expected) at HMRs
3. Number of H1ESC iHMRs in different clusters and their status in B cells.
4. Overlap of iHMRs with functional element predictions from ENCODE in H1ESCs.
5. Metaplots of MNase-seq read density from LCLs around iHMRs.
6. Heatmap showing the chromatin state within B cell iHMRs based on LCL data, compared to their state in H1ESCs. Each row represents one iHMR, sorted by hierarchical clustering.

**S2. Example pHMR vs. intergenic iHMR**

UCSC Genome Browser tracks display methylation profiles across a lymphoid specific expanded pHMR (A) and iHMR (B). Methylation frequencies, ranging from 0 to 1, of unique reads covering individual CpG sites are shown. Horizontal bars show identified hypomethylated regions (HMRs). ENCODE histone tracks are also shown.

**S3. Expanding Promoter HMRs**

Features of expanding promoter HMRs. Order matching Figure 3A)

1. CpG Density (observed / expected) in 50bp windows normalized to the maximum per row
2. CAGE tags in H1ESC cells
3. H3K4me2 enrichment over input in H1ESC cells
4. Most, but not all genes with expanding promoter HMRs are up-regulated. Boxplots representing the range of expression fold changes (CAGE signal; 5th to 95th percentile) for genes with or without an expanding promoter HMR in H1ES cells vs. differentiated LCLs are shown.
5. Bivalent chromatin state at expanded but transcriptionally silent promoter HMRs in H1ES cells. H1 hypomethylation expands over a larger region compared to the B cell state and is matched by H3K27me3 enrichment, while the core region of the HMR is shared and marked by H3K4me2.

**S4. Examples of shared intergenic iHMRs in H1ESC and LCLs that acquire H3K27me3 in LCLs.**

**S5. Methylation levels and Transcription at iHMRs in the blood lineage**

1. Methylation changes (difference in average CpG methylation level) at iHMRs between different blood cells and B cells shown for constitutive (shared with H1ESCs) and blood specific iHMRs.
2. Transcription marks bivalent iHMRs resolved to an active state. Chromatin profile in LCLs of iHMRs, which were bivalent in H1ESCs, depending on their transcriptional state (CAGE > 0.1RPM) in LCLs.
3. Genes near iHMRs resolved to an active state are upregulated. Gene expression fold change between LCLs and H1ESCs (CAGE RPM) for promoters near H1 bivalent iHMRs (1 – 25 kb), grouped by transcription at the iHMR.
4. Chromatin state at promoter HMRs from (c).

**S6. Chromatin state and transcription at DHS**

1. The Methylation state of DHS is only weakly related to the DNase-seq signal level. Average methylation level and DNase tag score for all intergenic DHS with a CpG density greater than 0.4 Observed / Expected.
2. Some pre-existing DHS become hypomethylated during differentiation. Change in methylation levels at intergenic non-CTCF DHS shared between H1ESCs and B cells.
3. Activation of shared DHS with variable methylation. Heatmap showing the chromatin state of DHS sites shared between H1ESC and B cells with B cell-specific iHMRs (methylation level in H1ESCs over 70%).
4. TBP binding predicts hypomethylation at DHS. Fraction of DHS overlapping iHMRs depending on DNase HS score and presence of a TBP ChiP-seq peak.

**S7. TBP and TATA boxes at eRNA**

1. The TATA-motif is enriched upstream of the eRNA TSS. Coverage by CAGE tags around TATA motif occurrences in iHMRs.
2. TFs are enriched at eRNA TSS. Profile of Tbp and Taf1 ChIP-seq signal in H1ESCs around CAGE peaks in enhancer-like iHMRs.
3. The TATA sequence at iHMRs is conserved. Average PhastCons score at TATA motifs (MEME hits for motif MA0108.2) around (-100bp to +25bp) TSS in enhancer HMRs.

Zoom-in of c).

**S8. Reproducibility of H1 HMRs, LCL/B cell HMR overlap**

1. Fraction of HMRs that are reproducible between H1ESC bisulfite-seq replicates
2. Methylation level differences between B cells and LCLs (GM12878) at different HMR types.
3. B cell-specific iHMRs are hypomethylated in LCLs (GM12878), but not in Neutrophils. Heatmaps showing methylation levels per CpG site for areas around B cell intergenic non-CTCF iHMRs. iHMRs are aligned based on their B cell boundaries between the black lines.

**S9. Comparing features of primary B cell, LCL, and H1ESC methylomes.**

1. Violin plots show the distribution of global methylation levels across all CpG sites with >9x coverage for B cells, LCLs and H1ESCs.
2. Pearson correlations of methylation levels between LCLs and other cell-types are given for either all CpG sites, or only CpG sites overlapping B cell HMRs.
3. Scatterplots show high concordance between LCLs and B cells for CpG methylation levels within B cell specific HMRs. High-density scatter plots with color transparency show individual CpG methylation levels (each dot) that intersect B cell HMRs for H1ESC vs. B cell (C), H1ESC vs. LCL (D) and B cell vs. LCL (E). Only CpG sites with >9x coverage were included.

**Table S1. Mapping, Methylation and HMR Statistics**

**Table S2. H1ESC iHMRs and Cluster Annotations**

**BED file of iHMRs with cluster assignment (in column 4):**

**2: Promoter-like, 3: CTCF, 4: Bivalent, 5: Enhancer-like**

**Table S3. B cell iHMRs and Cluster Annotaions**

**BED file of iHMRs with cluster assignment (in column 4):**

**2: Promoter-like, 3: Enhancer-like, 4: CTCF, 5: silent, 6: silent Promoter-like**
