# Supplementary material for: De novo DNA demethylation and noncoding transcription define active intergenic regulatory elements
Source: HighWire-hosted journal article supplement (doi:10.1101/gr.157271.113), 2013-06-28
Supplement: Supp_TableS1.xlsx [file Supp_TableS1.xlsx]

## Sheet: Sheet1
Table S1. Mapping and Methylation Statistics
		Sequenced	Mapped (no duplicates)	Percent	Mean	Median	BS conversion	Methylation	HMRs
Human	GM12878	773714864	391180147	0.505587	10.1421	7	0.980546	0.556932	40960
Chimp	B-cell	403990681	136524522	0.33794	7.2987	7	0.99254	0.734079	50966
Chimp	Neutrophil	366459526	211296728	0.57659	7.13177	6	0.993021	0.74869	60210
Chimp	HSPC	678883664	222604864	0.327898	5.17692	5	0.992724	0.759866	47559
