# Supplementary figures and images for: De novo DNA demethylation and noncoding transcription define active intergenic regulatory elements
Source: HighWire-hosted journal article supplement (doi:10.1101/gr.157271.113), 2013-06-28

Figure S7

A

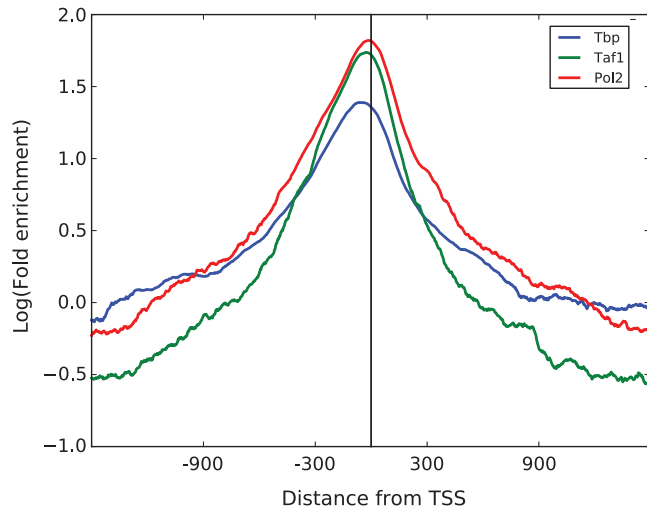

B

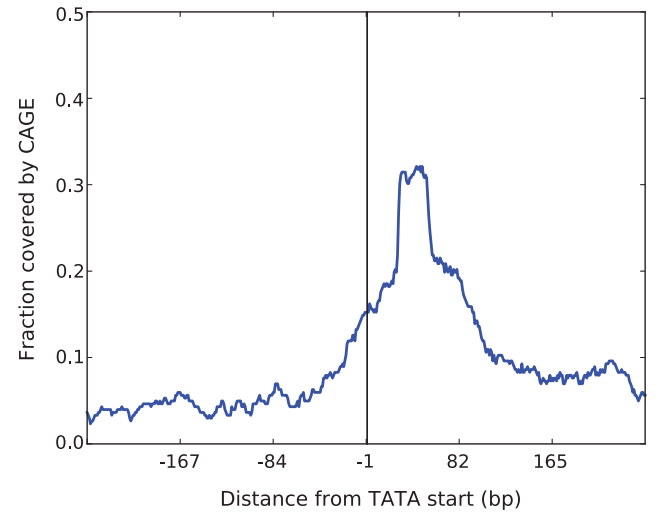

C

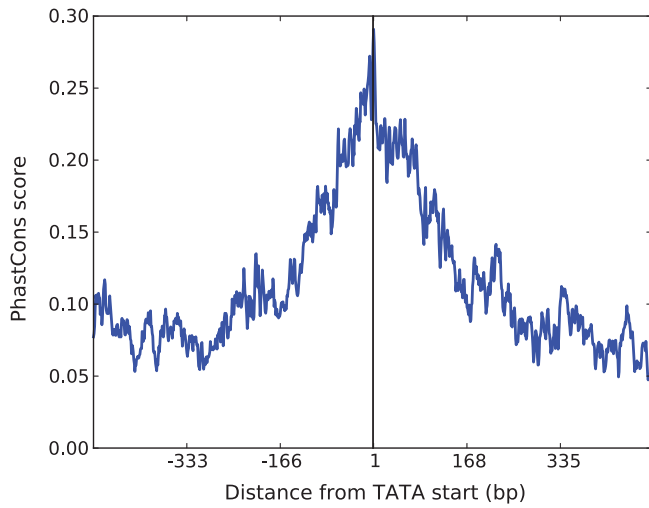

D

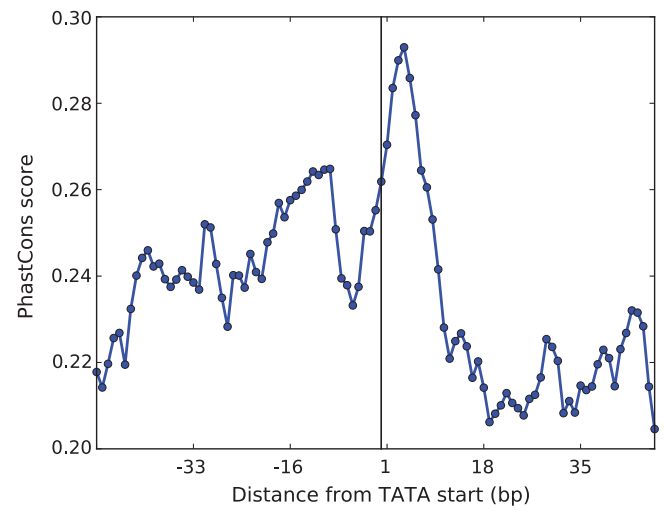

Supplement: Supp_FigS7.pdf [file Supp_FigS7.pdf]
